# Supplementary material for: Synthesis, DFT Calculations, Antiproliferative, Bactericidal Activity and Molecular Docking of Novel Mixed-Ligand Salen/8-Hydroxyquinoline Metal Complexes
Source: MDPI journal article supplement (doi:10.3390/molecules26164725), 2021-08-04
Supplement: s1 [file s1]

**Table (S1): Results of antibacterial bioassay of Salen ligand, metal salt and its mixed 8-hydroxy quinoline with Co, Ni, Cd, Al, La complexes against different strains of bacteria and fungi**

| Compound                                | Mic of Bacteria mg mL <sup>-1</sup> |                   |               |                  |
|-----------------------------------------|-------------------------------------|-------------------|---------------|------------------|
|                                         | S. aureus (+ve)                     | B. subtilis (+ve) | E. coli (-ve) | P. vulgaris(-ve) |
| <b>S</b>                                | <b>14</b>                           | <b>13</b>         | <b>12</b>     | <b>15</b>        |
| <b>Q</b>                                | <b>16</b>                           | <b>14</b>         | <b>13</b>     | <b>16</b>        |
| <b>Gentamycin</b>                       | <b>24</b>                           | <b>26</b>         | <b>30</b>     | <b>25</b>        |
| <b>CoSQ</b>                             | <b>18</b>                           | <b>15</b>         | <b>13</b>     | <b>13</b>        |
| <b>NiSQ</b>                             | <b>20</b>                           | <b>16</b>         | <b>14</b>     | <b>15</b>        |
| <b>CdSQ</b>                             | <b>26</b>                           | <b>30</b>         | <b>28</b>     | <b>30</b>        |
| <b>AlSQ</b>                             | <b>31</b>                           | <b>25</b>         | <b>23</b>     | <b>24</b>        |
| <b>LaSQ</b>                             | <b>29</b>                           | <b>30</b>         | <b>20</b>     | <b>27</b>        |
| <b>CoCl<sub>2</sub>.6H<sub>2</sub>O</b> | <b>15</b>                           | <b>10</b>         | <b>9</b>      | <b>11</b>        |
| <b>NiCl<sub>2</sub>.6H<sub>2</sub>O</b> | <b>16</b>                           | <b>9</b>          | <b>12</b>     | <b>13</b>        |
| <b>CdCl<sub>2</sub>.H<sub>2</sub>O</b>  | <b>19</b>                           | <b>23</b>         | <b>24</b>     | <b>24</b>        |
| <b>AlCl<sub>3</sub>.6H<sub>2</sub>O</b> | <b>25</b>                           | <b>18</b>         | <b>17</b>     | <b>19</b>        |
| <b>LaCl<sub>3</sub>.7H<sub>2</sub>O</b> | <b>22</b>                           | <b>26</b>         | <b>14</b>     | <b>23</b>        |
| <b>Ref. 43</b>                          | <b>CoSI</b>                         | <b>11</b>         | <b>13</b>     | <b>11</b>        |
|                                         | <b>NiSI</b>                         | <b>12</b>         | <b>15</b>     | <b>12</b>        |
|                                         | <b>CdSI</b>                         | <b>20</b>         | <b>33</b>     | <b>25</b>        |
|                                         | <b>AlSI</b>                         | <b>NA</b>         | <b>NA</b>     | <b>NA</b>        |
|                                         | <b>LaSI</b>                         | <b>12</b>         | <b>13</b>     | <b>NA</b>        |

**Table (S2): Results of antifungal bioassay of Salen ligand, metal salt and its mixed 8-hydroxy quinoline with Co, Ni, Cd, Al, La complexes against different strains of bacteria and fungi**

| Compound                                |             | Mic of Fungi mg ml <sup>-1</sup> |                    |
|-----------------------------------------|-------------|----------------------------------|--------------------|
|                                         |             | Candida albicans                 | Aspergillus flavus |
| <b>S</b>                                |             | <b>0</b>                         | <b>0</b>           |
| <b>Q</b>                                |             | <b>13</b>                        | <b>16</b>          |
| <b>Ketoconazole</b>                     |             | <b>16</b>                        | <b>20</b>          |
| <b>CoSQ</b>                             |             | <b>0</b>                         | <b>0</b>           |
| <b>NiSQ</b>                             |             | <b>0</b>                         | <b>0</b>           |
| <b>CdSQ</b>                             |             | <b>23</b>                        | <b>28</b>          |
| <b>AlSQ</b>                             |             | <b>37</b>                        | <b>28</b>          |
| <b>LaSQ</b>                             |             | <b>38</b>                        | <b>25</b>          |
| <b>CoCl<sub>2</sub>.6H<sub>2</sub>O</b> |             | <b>0</b>                         | <b>0</b>           |
| <b>NiCl<sub>2</sub>.6H<sub>2</sub>O</b> |             | <b>0</b>                         | <b>0</b>           |
| <b>CdCl<sub>2</sub>.H<sub>2</sub>O</b>  |             | <b>14</b>                        | <b>20</b>          |
| <b>AlCl<sub>3</sub>.6H<sub>2</sub>O</b> |             | <b>29</b>                        | <b>20</b>          |
| <b>LaCl<sub>3</sub>.7H<sub>2</sub>O</b> |             | <b>27</b>                        | <b>19</b>          |
| <b>Ref. 43</b>                          | <b>CoSI</b> | <b>0</b>                         | <b>0</b>           |
|                                         | <b>NiSI</b> | <b>0</b>                         | <b>0</b>           |
|                                         | <b>CdSI</b> | <b>20</b>                        | <b>30</b>          |
|                                         | <b>AlSI</b> | <b>0</b>                         | <b>0</b>           |
|                                         | <b>LaSI</b> | <b>0</b>                         | <b>0</b>           |

**Table S3:** Important optimized bond lengths (Å) and bond angles (°) of [Co(S)(Q)(H<sub>2</sub>O)]:

| Type of bond  | Bond length(Å) | Type of bond  | Bond length(Å) |         |
|---------------|----------------|---------------|----------------|---------|
|               | Complex        |               | S              | Complex |
| Co-N1         | 1.908          | Co-O3         | -              | 2.162   |
| Co-N2         | 2.272          |               |                |         |
| Co-N3         | 1.993          | N1...N2       | 3.788          | 2.709   |
| Co-O4         | 2.113          | N1...O2       | 4.261          | 2.720   |
| Co-O2         | 2.007          | N2...O2       | 7.003          | 3.045   |
| Type of Angle | Angle (°)      | Type of Angle | Angle (°)      |         |
|               | Complex        |               | Complex        |         |
| N1-Co-N2      | 80.28          | O3-Co-N1      | 91.58          |         |
| N3-Co-O4      | 82.38          | O3-Co-N2      | 93.53          |         |
| N1-Co-O4      | 91.04          | O3-Co-N3      | 90.01          |         |
| N2-Co-N3      | 106.6          | O3-Co-O4      | 79.26          |         |
| O2-Co-N1      | 88.00          | N1-Co-N3      | 172.8          |         |
| O2-Co-N2      | 90.52          | N2-Co-O4      | 168.6          |         |
| O2-Co-N3      | 89.90          | O2-Co-O3      | 175.7          |         |
| O2-Co-O4      | 96.57          | N1-N2-N3-O4   | 6.999*         |         |

\*dihedral angle

**Table (S4): Results of Important optimized bond lengths (Å) and bond angles (°) of [Ni(S)(Q)(H<sub>2</sub>O)]**

| Type of bond  | Bond length(Å) | Type of bond  | Bond length(Å) |         |
|---------------|----------------|---------------|----------------|---------|
|               | Complex        |               | S              | Complex |
| Ni-N1         | 2.151          | Ni-O3         | -              | 1.997   |
| Ni-N2         | 2.249          |               |                |         |
| Ni-N3         | 2.288          | N1•••N2       | 3.788          | 2.777   |
| Ni-O4         | 2.071          | N1•••O2       | 4.261          | 2.717   |
| Ni-O2         | 1.860          | N2•••O2       | 7.003          | 2.950   |
| Type of Angle | Angle (°)      | Type of Angle | Angle (°)      |         |
|               | Complex        |               | Complex        |         |
| N1-Ni-N2      | 78.22          | O3-Ni-N1      | 93.93          |         |
| N3-Ni-O4      | 78.98          | O3-Ni-N2      | 92.55          |         |
| N1-Ni-O4      | 100.1          | O3-Ni-N3      | 87.35          |         |
| N2-Ni-N3      | 102.8          | O3-Ni-O4      | 83.65          |         |
| O2-Ni-N1      | 84.96          | N1-Ni-N3      | 178.3          |         |
| O2-Ni-N2      | 91.27          | N2-Ni-O4      | 175.7          |         |
| O2-Ni-N3      | 93.69          | O2-Ni-O3      | 175.7          |         |
| O2-Ni-O4      | 92.46          | N1-N2-N3-O4   | -3.917*        |         |

\*dihedral angle

**Table (S5): Results of Important optimized bond lengths (Å) and bond angles (°) of [Cd(S)(Q)(H<sub>2</sub>O)]:**

| Type of bond  | Bond length(Å) | Type of bond  | Bond length(Å) |         |
|---------------|----------------|---------------|----------------|---------|
|               | Complex        |               | S              | Complex |
| Cd-N1         | 2.227          | Cd-O3         | -              | 2.372   |
| Cd-N2         | 2.409          |               |                |         |
| Cd-N3         | 2.312          | N1...N2       | 3.788          | 2.886   |
| Cd-O4         | 2.219          | N1...O2       | 4.261          | 2.874   |
| Cd-O2         | 2.231          | N2...O2       | 7.003          | 3.349   |
| Type of Angle | Angle (°)      | Type of Angle | Angle (°)      |         |
|               | Complex        |               | Complex        |         |
| N1-Cd-N2      | 76.87          | O3-Cd-N1      | 94.14          |         |
| N3-Cd-O4      | 77.40          | O3-Cd-N2      | 90.38          |         |
| N1-Cd-O4      | 99.93          | O3-Cd-N3      | 90.11          |         |
| N2-Cd-N3      | 106.2          | O3-Cd-O4      | 84.06          |         |
| O2-Cd-N1      | 80.28          | N1-Cd-N3      | 174.7          |         |
| O2-Cd-N2      | 92.34          | N2-Cd-O4      | 173.4          |         |
| O2-Cd-N3      | 95.24          | O2-Cd-O3      | 173.1          |         |
| O2-Cd-O4      | 92.80          | N1-N2-N3-O4   | -7.655*        |         |

\*dihedral angle

**Table (S6): Results of Important optimized bond lengths (Å) and bond angles (°) of [Al(S)(Q)(H<sub>2</sub>O)]<sup>+</sup>**

| Type of bond  | Bond length(Å) | Type of bond  | Bond length(Å) |         |
|---------------|----------------|---------------|----------------|---------|
|               | Complex        |               | S              | Complex |
| Al- N1        | 1.974          | Al- O3        | -              | 2.052   |
| Al- N2        | 2.122          |               |                |         |
| Al- N3        | 2.065          | N1...N2       | 3.788          | 2.674   |
| Al- O4        | 1.891          | N1...O2       | 4.261          | 2.673   |
| Al- O2        | 1.869          | N2...O2       | 7.003          | 2.872   |
| Type of Angle | Angle (°)      | Type of Angle | Angle (°)      |         |
|               | Complex        |               | Complex        |         |
| N1-Al- N2     | 81.42          | O3-Al- N1     | 90.01          |         |
| N3-Al- O4     | 83.86          | O3-Al- N2     | 87.42          |         |
| N1-Al- O4     | 95.59          | O3-Al- N3     | 88.39          |         |
| N2-Al- N3     | -104.9         | O3-Al- O4     | 82.89          |         |
| O2-Al- N1     | 88.13          | N1-Al- N3     | 178.4          |         |
| O2-Al- N2     | 92.34          | N2-Al- O4     | 169.9          |         |
| O2-Al- N3     | 91.84          | O2-Al- O3     | 178.1          |         |
| O2-Al- O4     | 97.74          | N1-N2-N3-O4   | -5.790*        |         |

\*dihedral angle

**Table S7:** Important optimized bond lengths (Å) and bond angles (°) of [La(S)(Q)Cl]

| Type of bond  | Bond length(Å)<br>Complex | Type of bond  | Bond length(Å)<br>L                  Complex |       |
|---------------|---------------------------|---------------|----------------------------------------------|-------|
| La-N1         | 2.534                     | La-O2         | -                                            | 2.396 |
| La-N2         | 2.704                     |               |                                              |       |
| La-O3         | 2.402                     | N1- - - -N2   | 3.788                                        | 2.991 |
| La-N3         | 2.621                     | N1- - - -O2   | 4.261                                        | 3.022 |
| La-Cl         | 2.828                     | N2- - - -O2   | 7.003                                        | 3.674 |
| Type of Angle | Angle (°)<br>Complex      | Type of Angle | Angle (°)<br>Complex                         |       |
| N1-La- N2     | 69.55                     | Cl-La-N1      | 94.01                                        |       |
| N3-La-O3      | 69.70                     | Cl-La-N2      | 88.38                                        |       |
| N1-La-O3      | 107.2                     | Cl-La-N3      | 93.10                                        |       |
| N2-La-N3      | 113.5                     | Cl-La-O3      | 91.66                                        |       |
| O2-La-N1      | 75.55                     | N1-La-N3      | 172.3                                        |       |
| O2-La-N2      | 91.96                     | N2-La-O3      | 176.8                                        |       |
| O2-La-N3      | 97.13                     | O2-La-Cl      | 168.7                                        |       |
| O2-La-O3      | 87.36                     | N1-N2-N3-O3   | -5.859*                                      |       |

\*dihedral angle





A

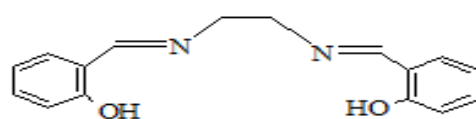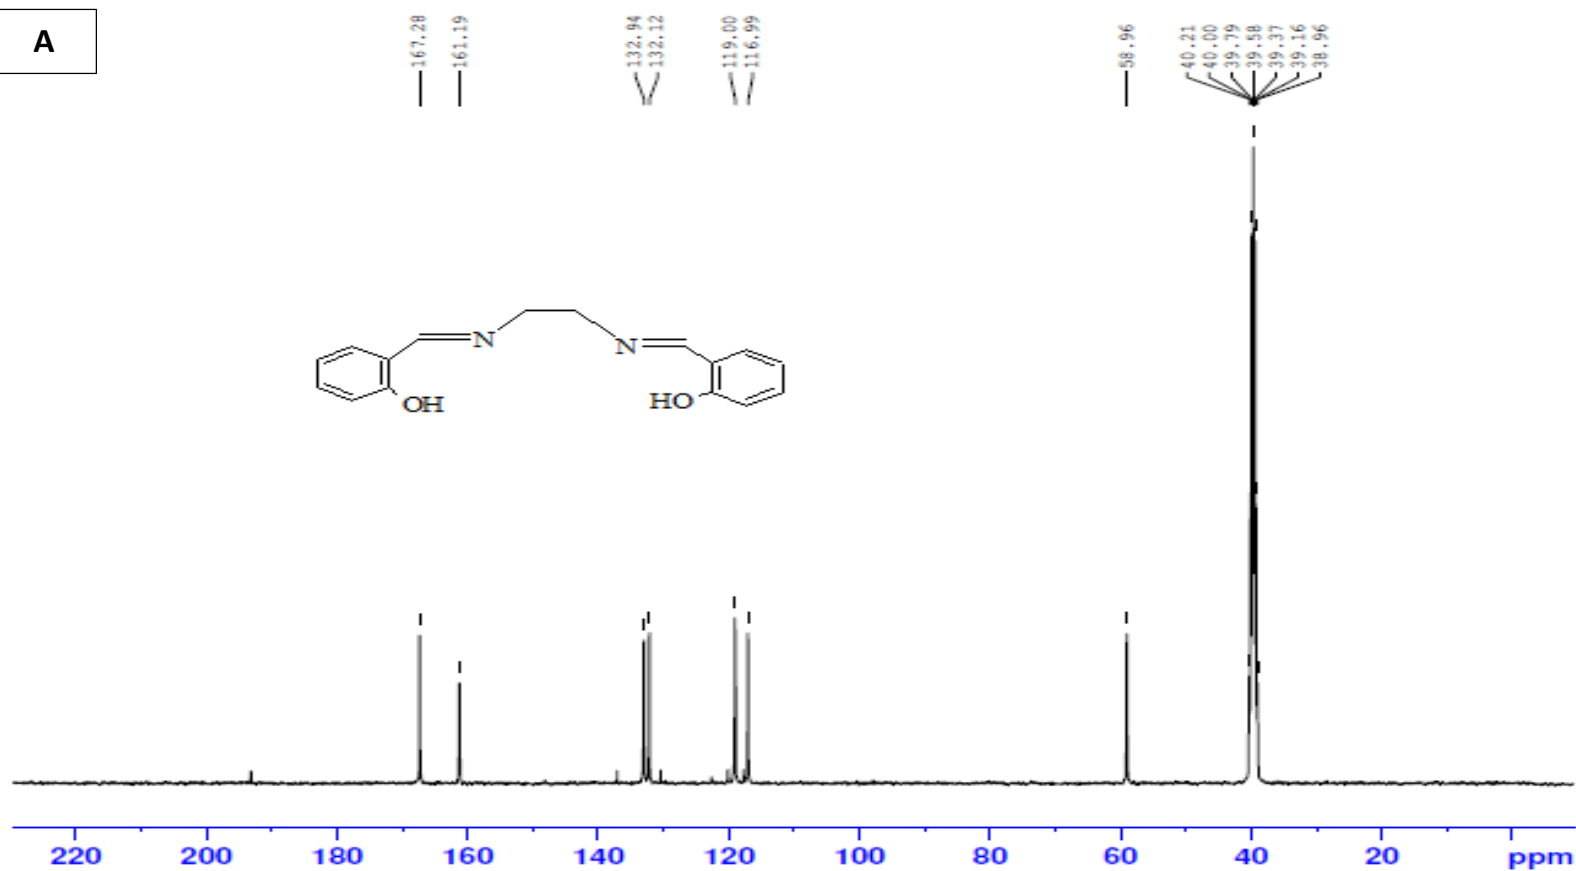

**B**

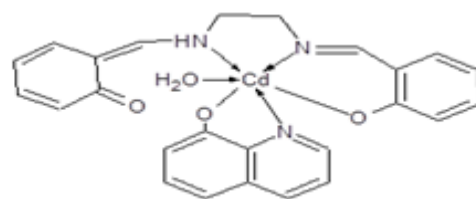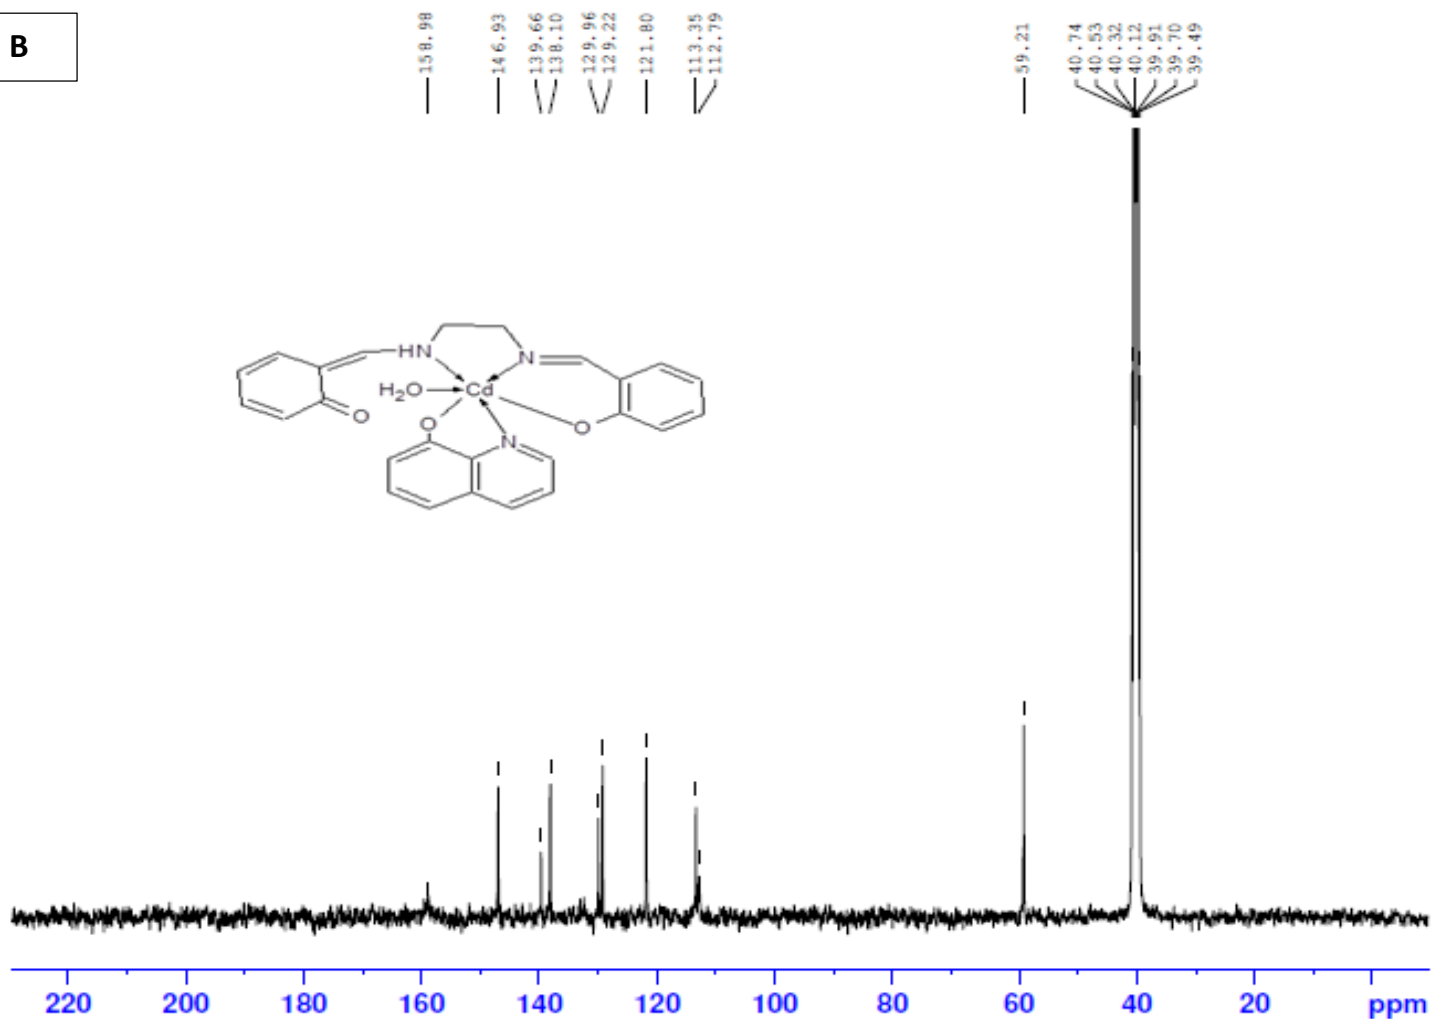

C

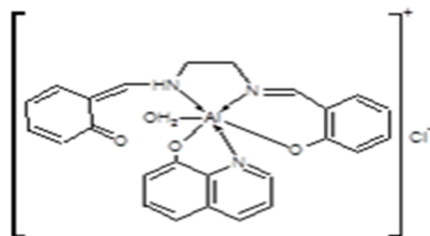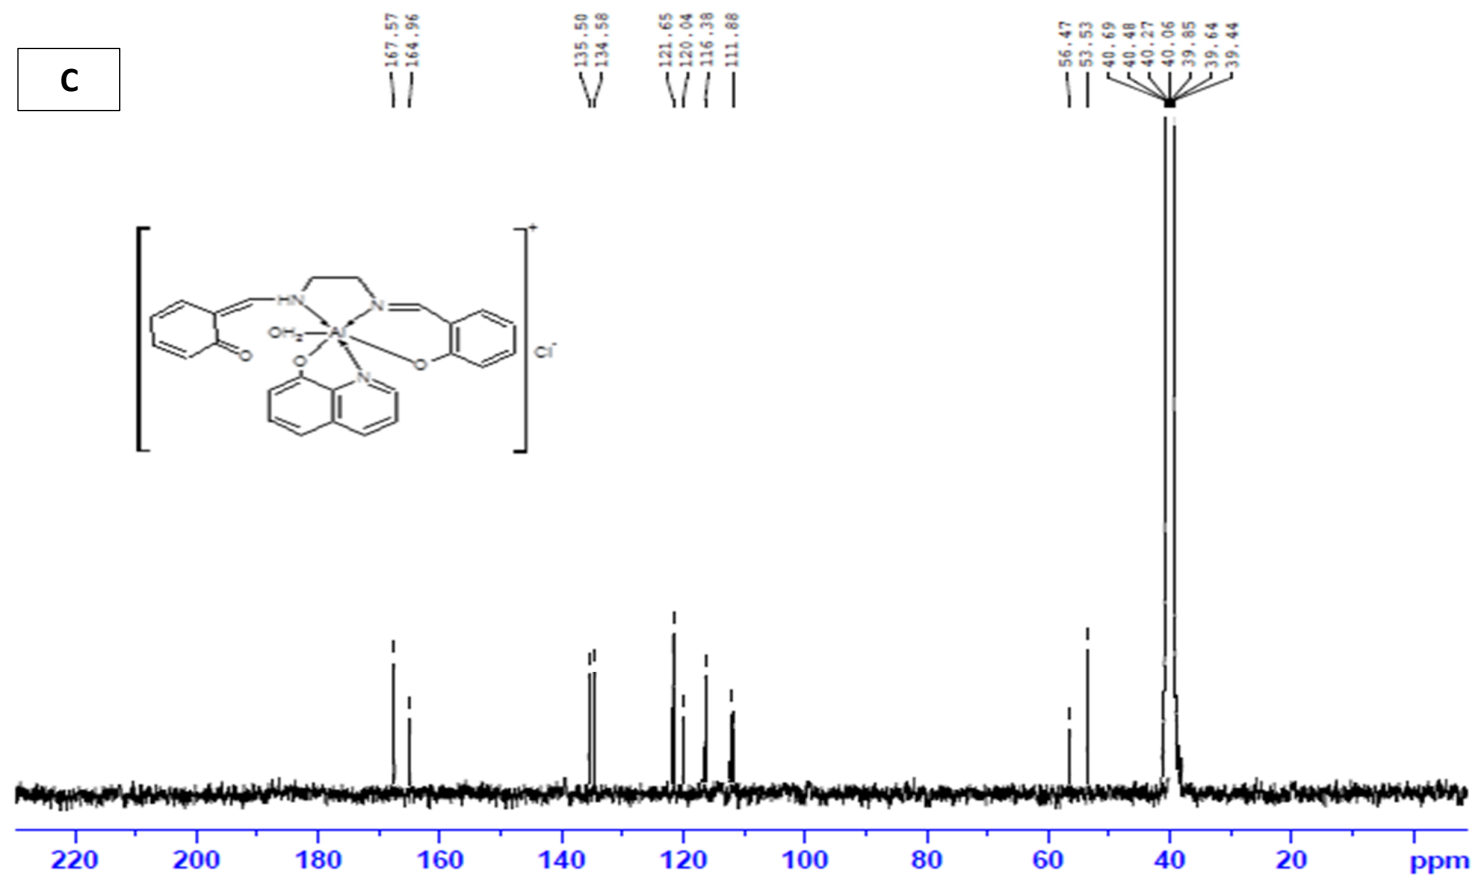

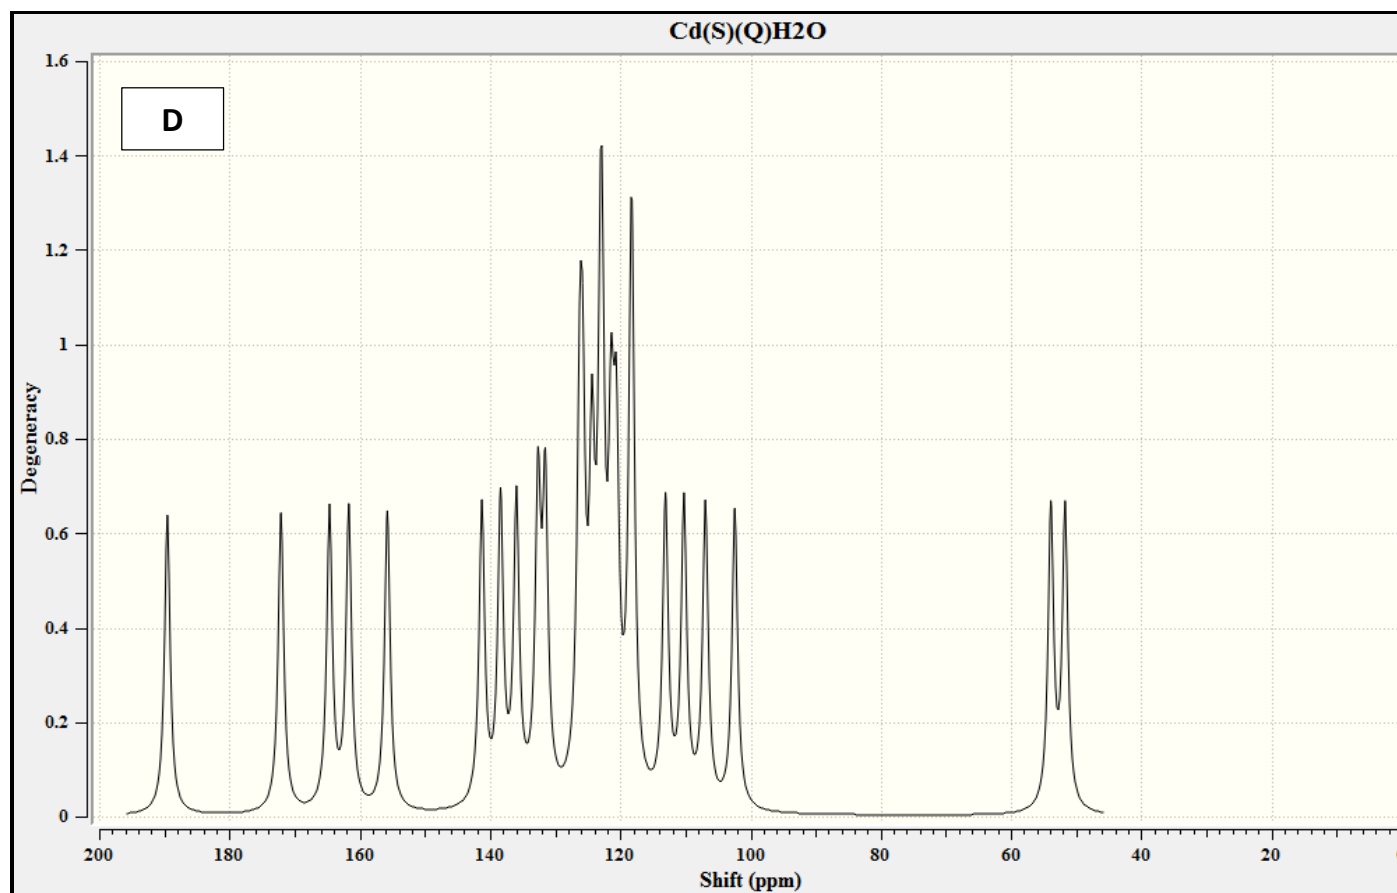

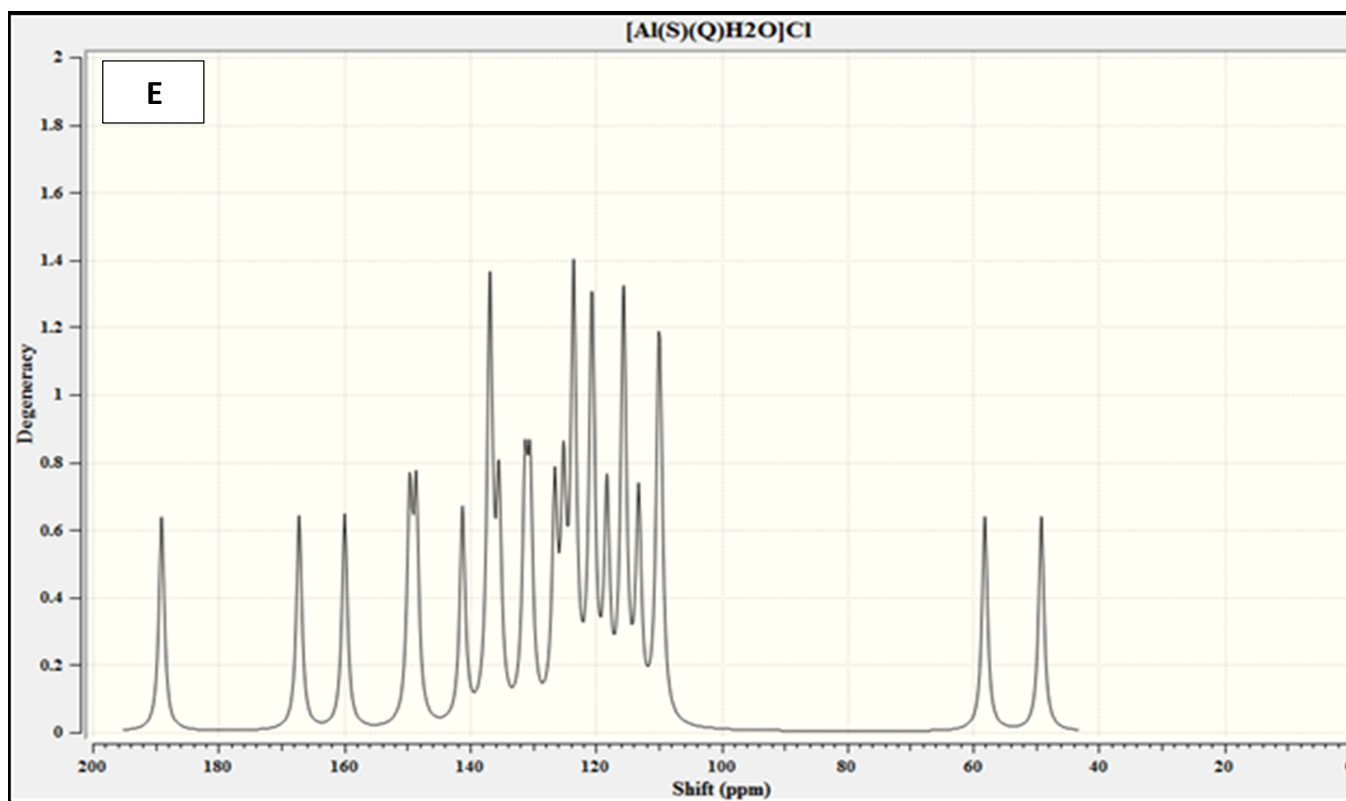

Figures (S1):  $^{13}\text{C}$  NMR spectra of Salen ligand (A) and Cd(B and D), Al(C and E) mixed 8-hydroxy quinoline complexes

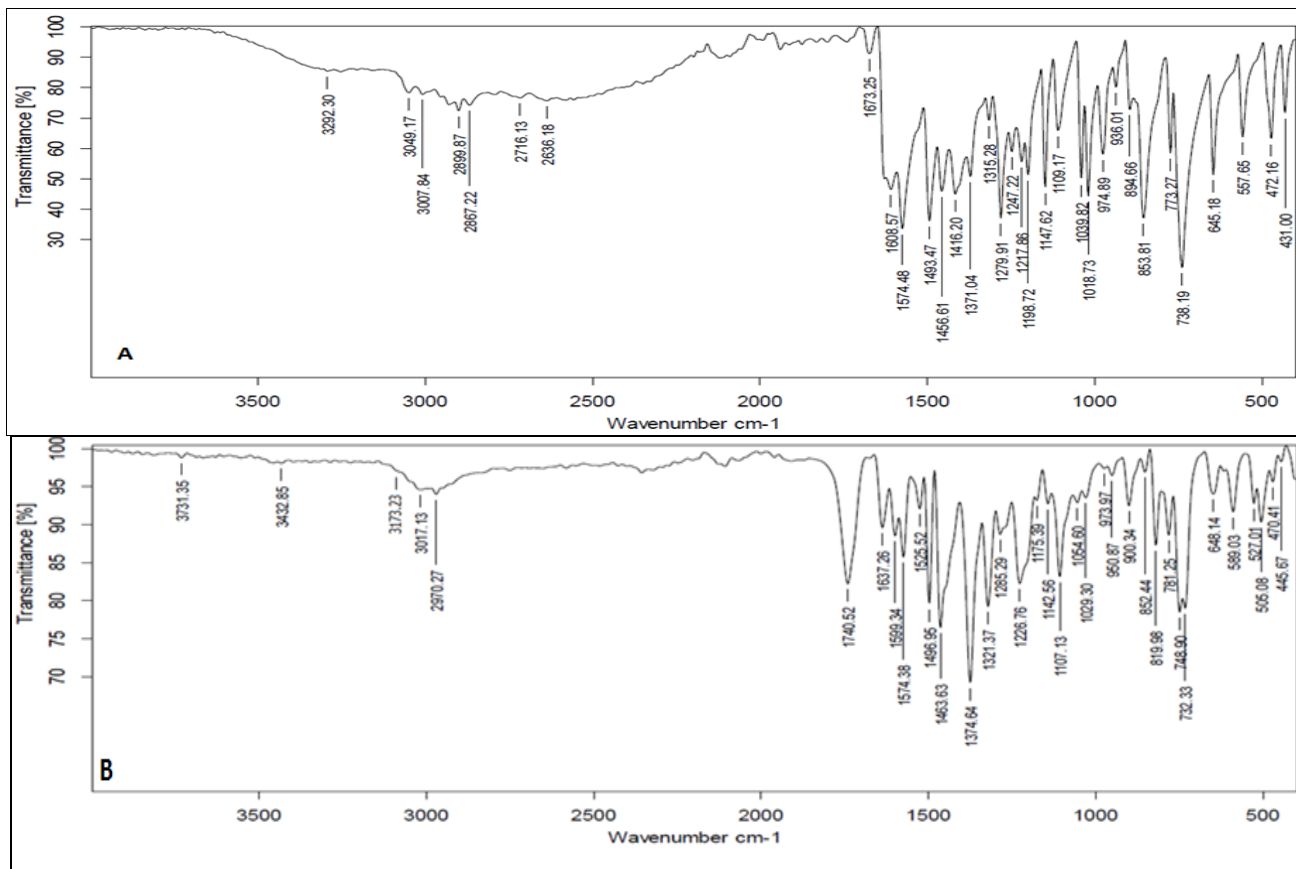

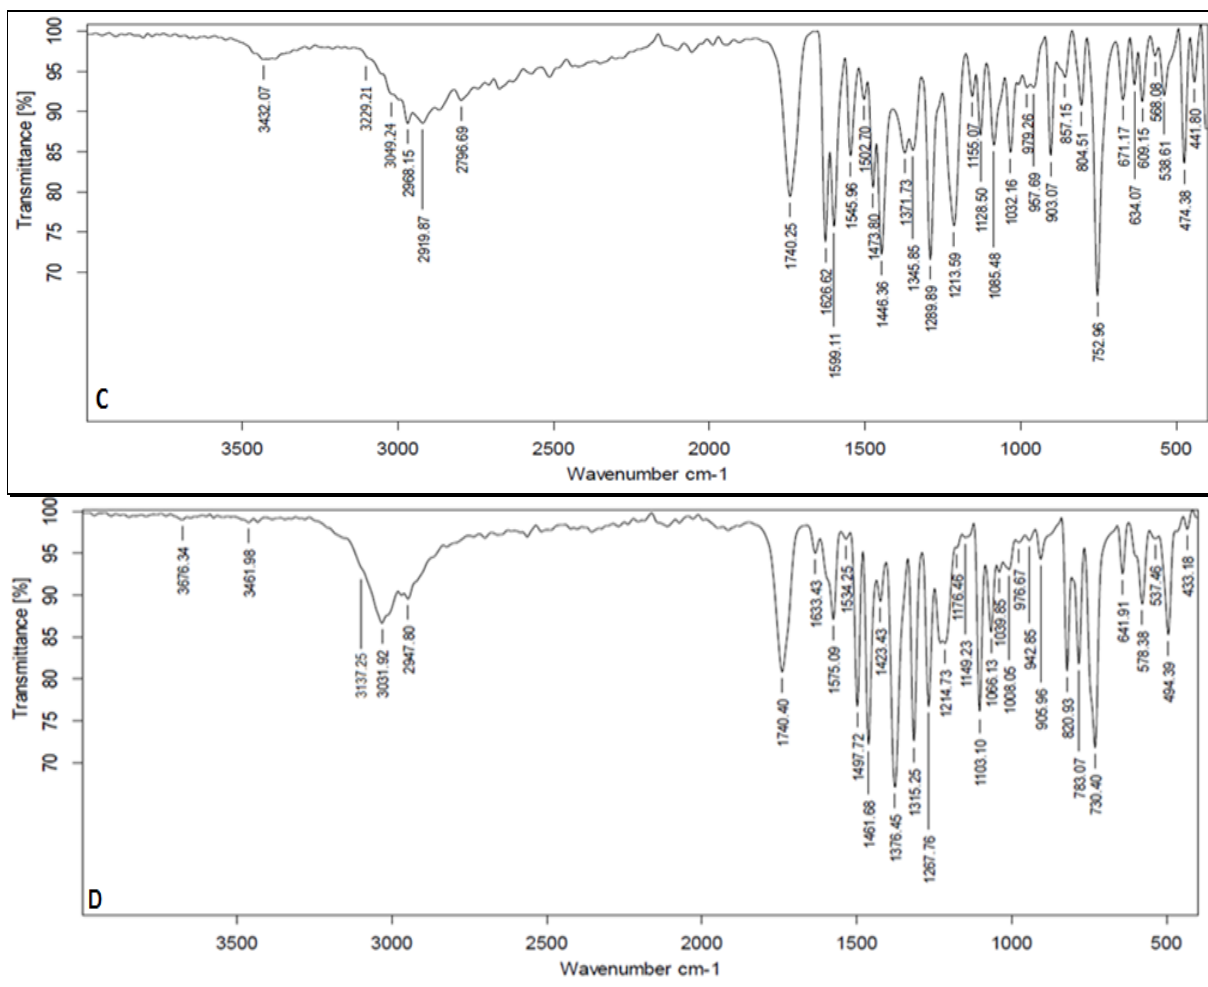

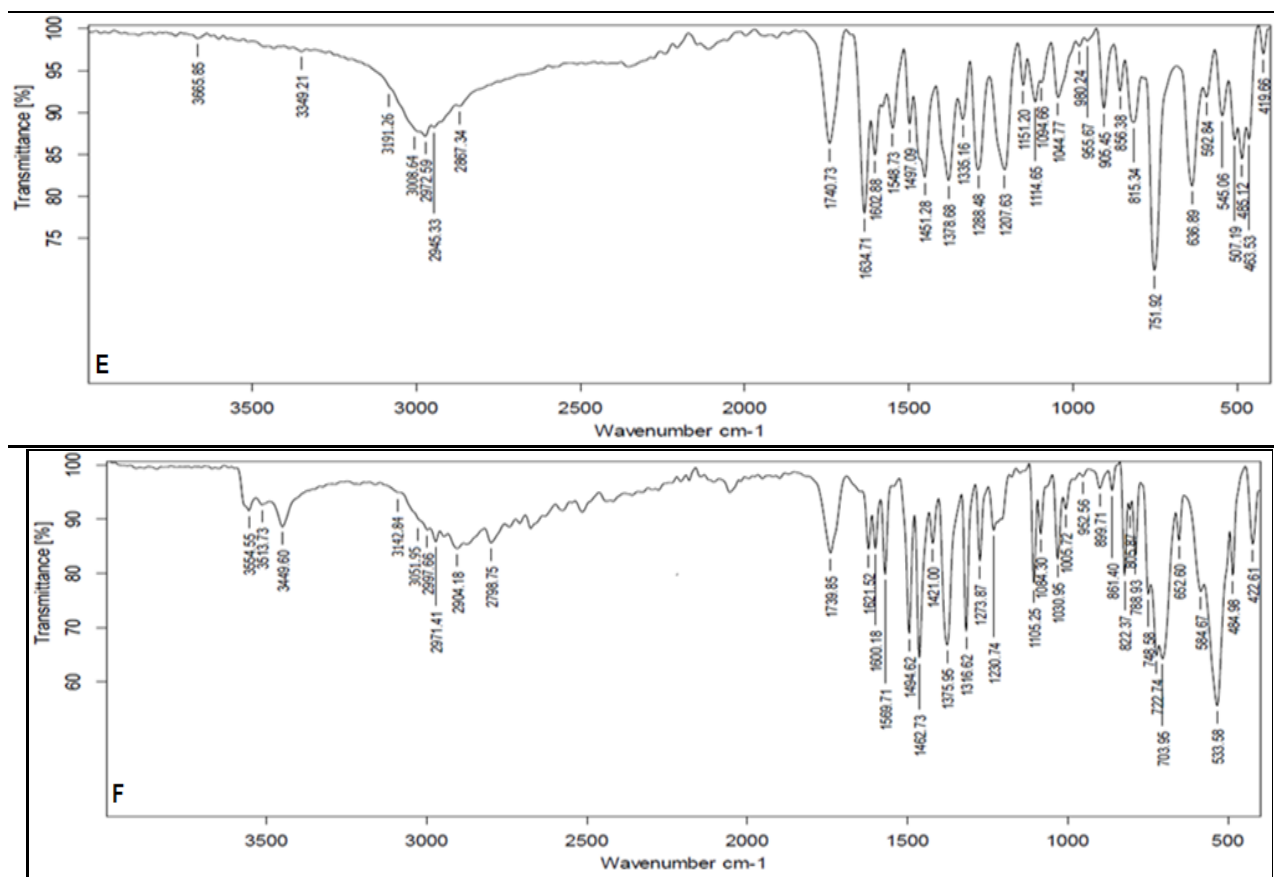

Figures (S2) : FT IR spectral of Salen Schiff base ligand (A) and its mixed 8-hydroxy quinoline (B)Co, (C)Ni, (D)Cd, (E)Al, (F)La complexes in 4000-400 cm<sup>-1</sup>



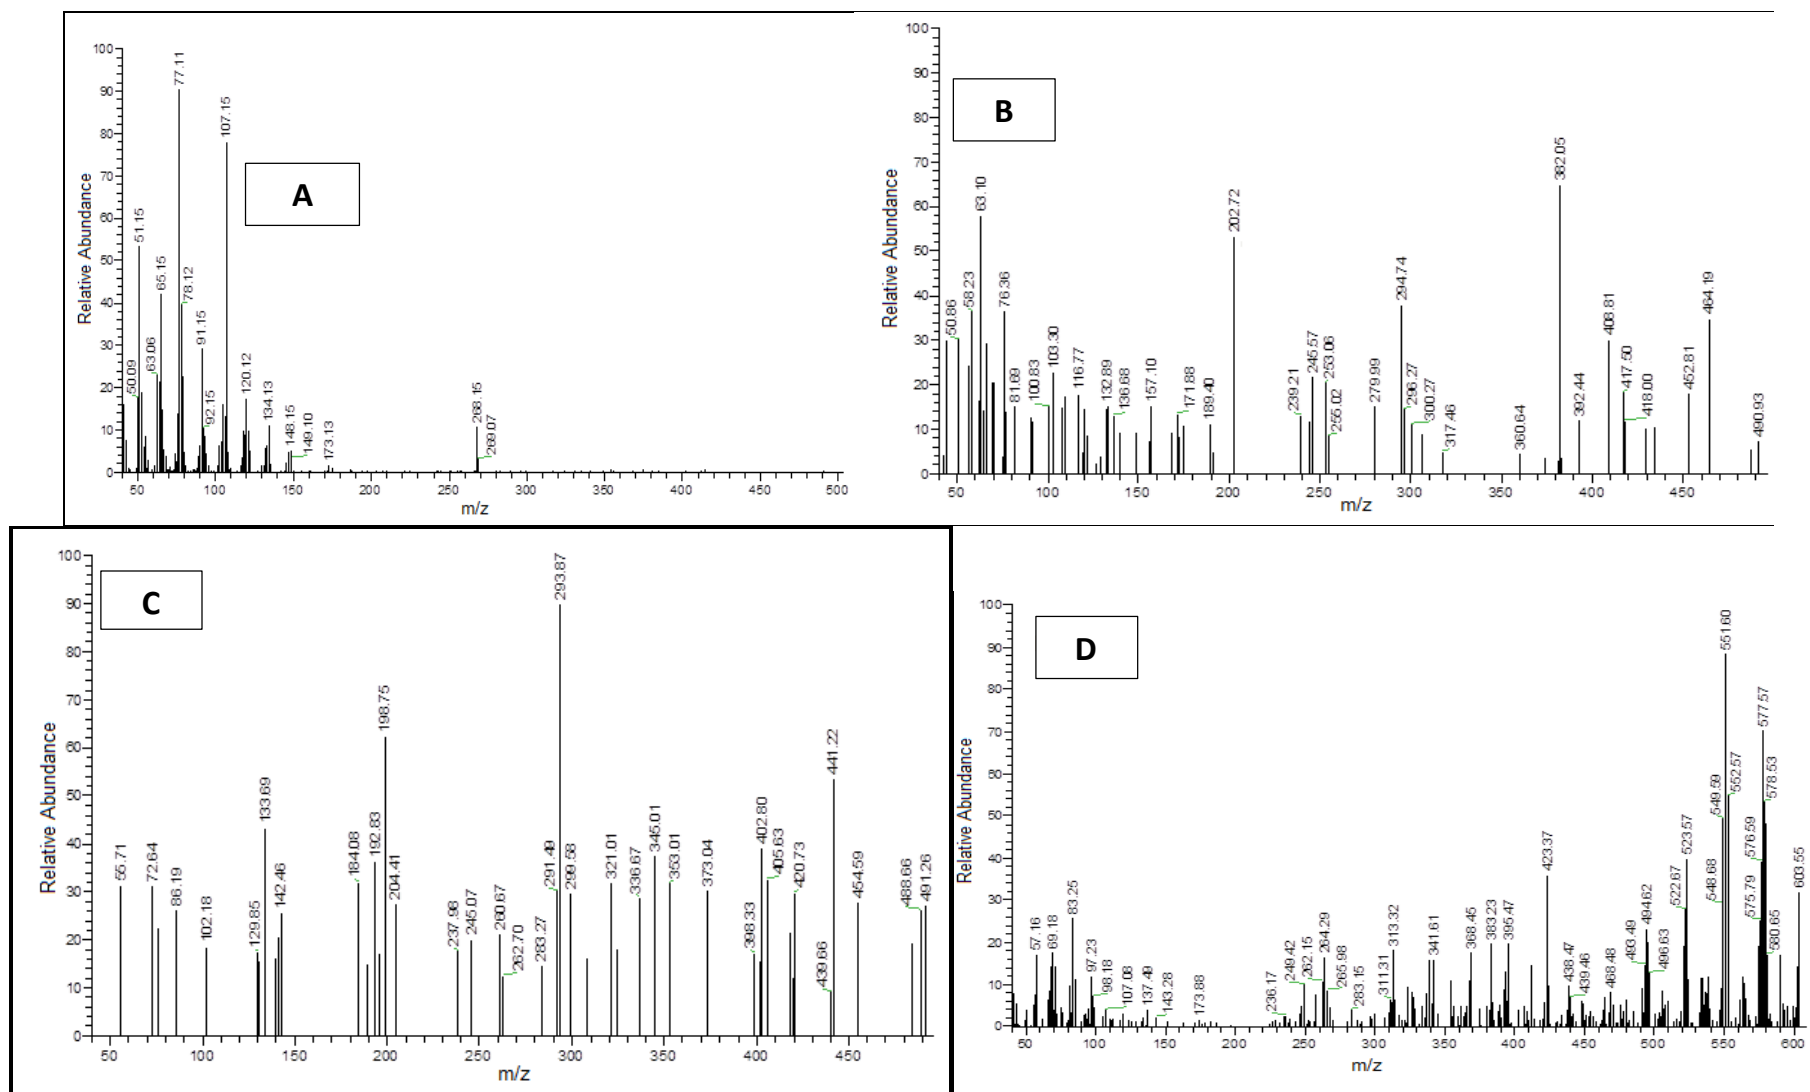

**Figures (S3):** The mass spectrum of Salen Schiff base ligand (A) and its mixed 8-hydroxy quinoline (B)CoSQ, (C)AlSQ, (D)LaSQ complexes

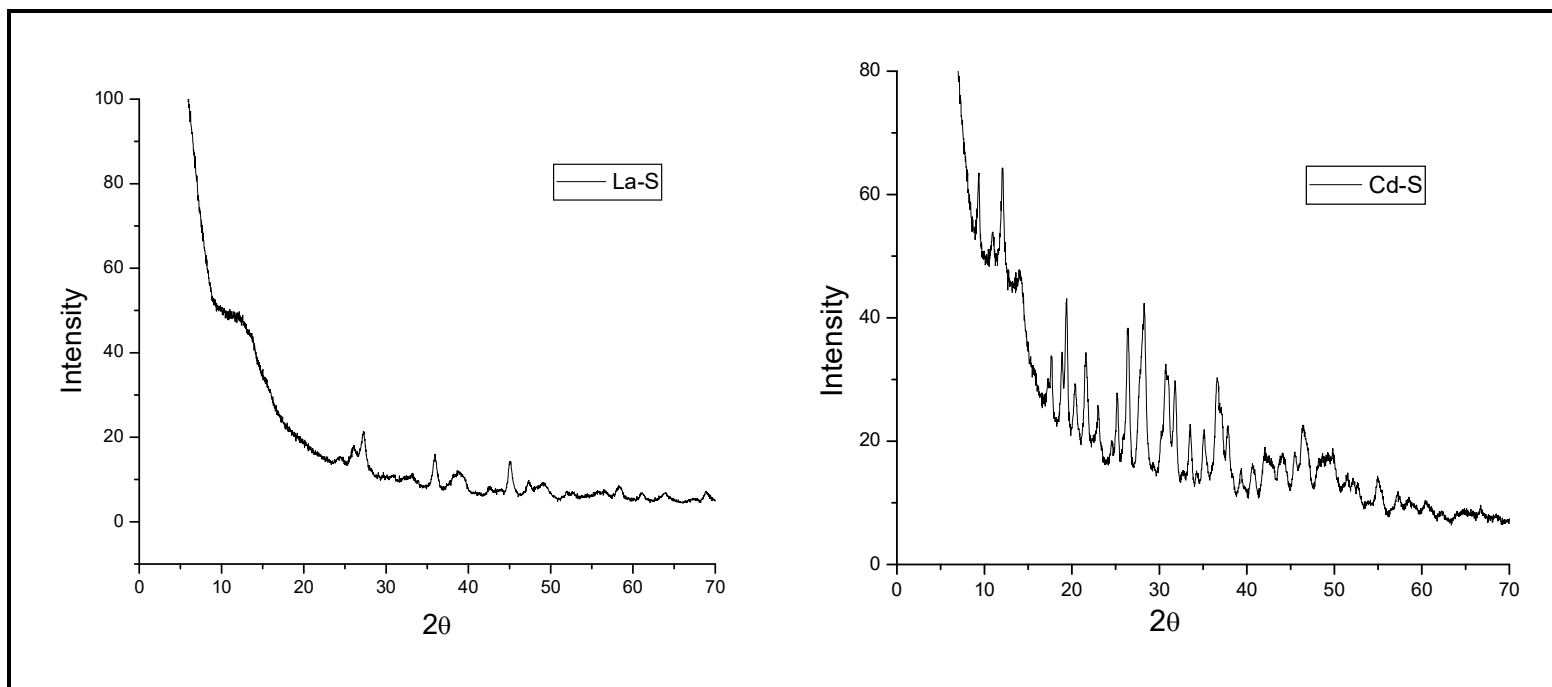

**Figures (S4):** PXRD powder pattern of Salen and its mixed CdSQ and LaSQ complexes. with 8-hydroxy quinolone

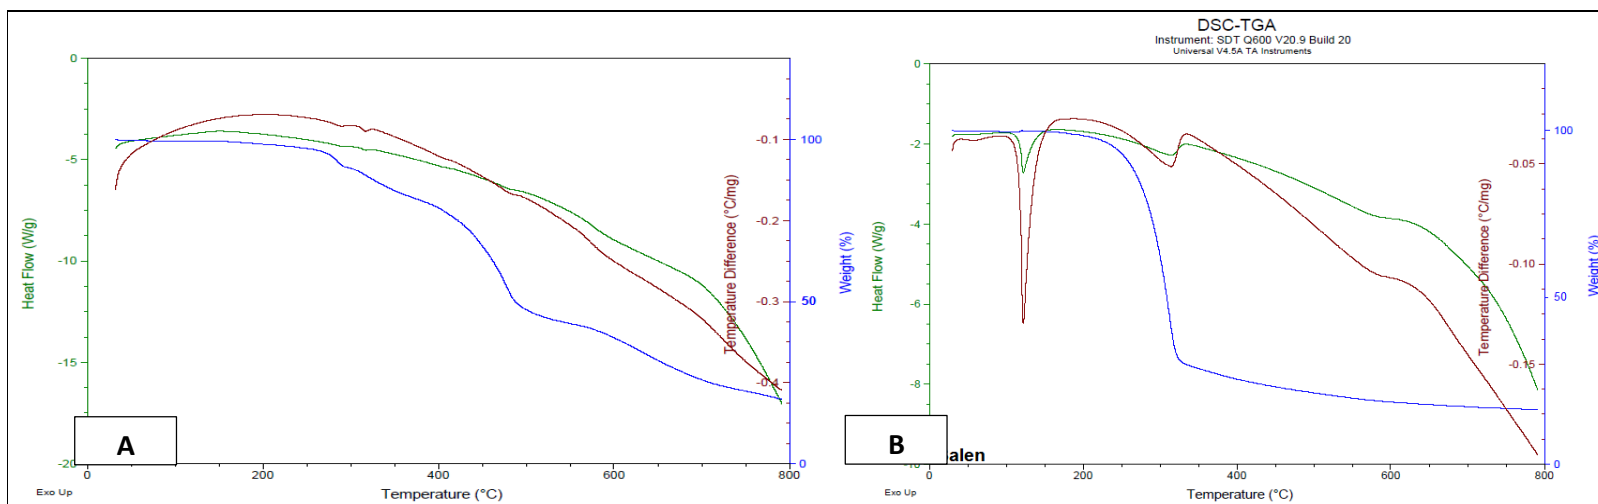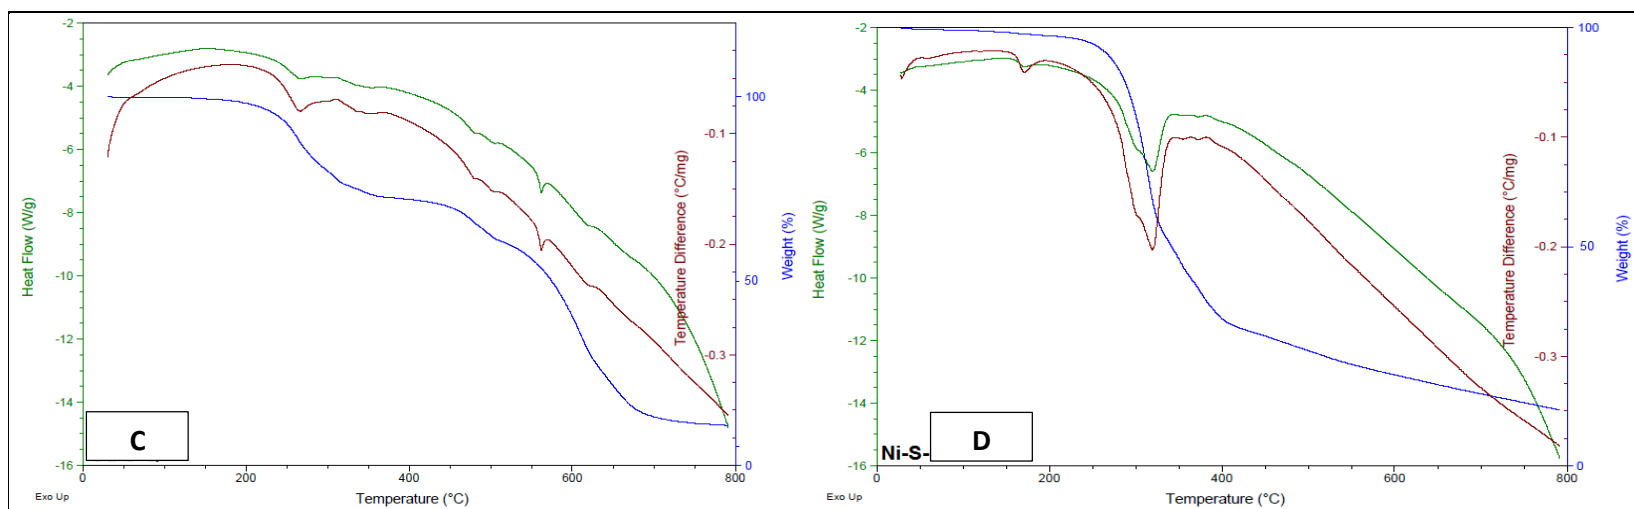

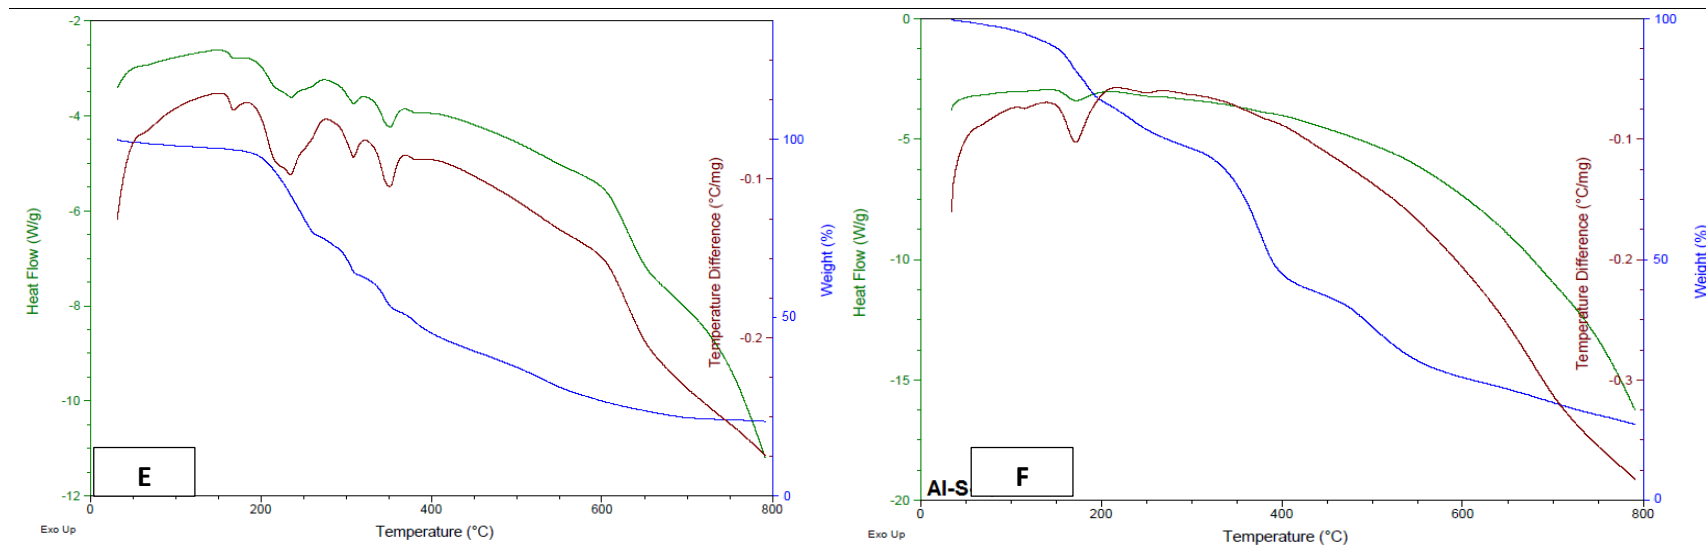

**Figures (S5):** Characteristic DSC-TGA curve of Salen ligand (A) and and its mixed 8-hydroxy quinoline (B)CoSQ, (C)NiSQ, (D)CdSQ, (E)AlSQ, (F)LaSQ complexes

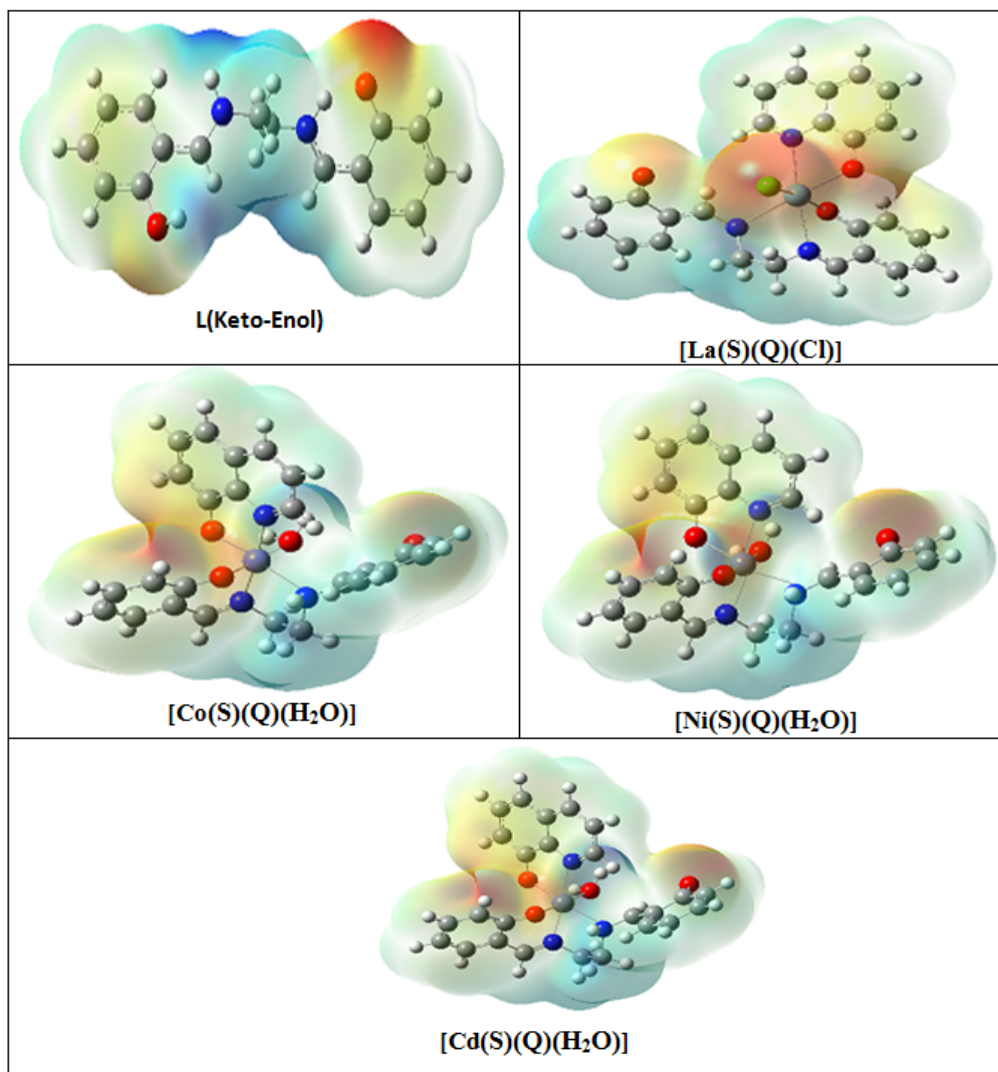

**Figure S6:** Molecular electrostatic potential (MEP) surface of ligand, L (Keto-Enol) and complexes [Co(S)(Q)(H<sub>2</sub>O)], [Ni(S)(Q)(H<sub>2</sub>O)], [Cd(S)(Q)(H<sub>2</sub>O)], and [La(S)(Q) Cl] using B3LYP/LANL2DZ.

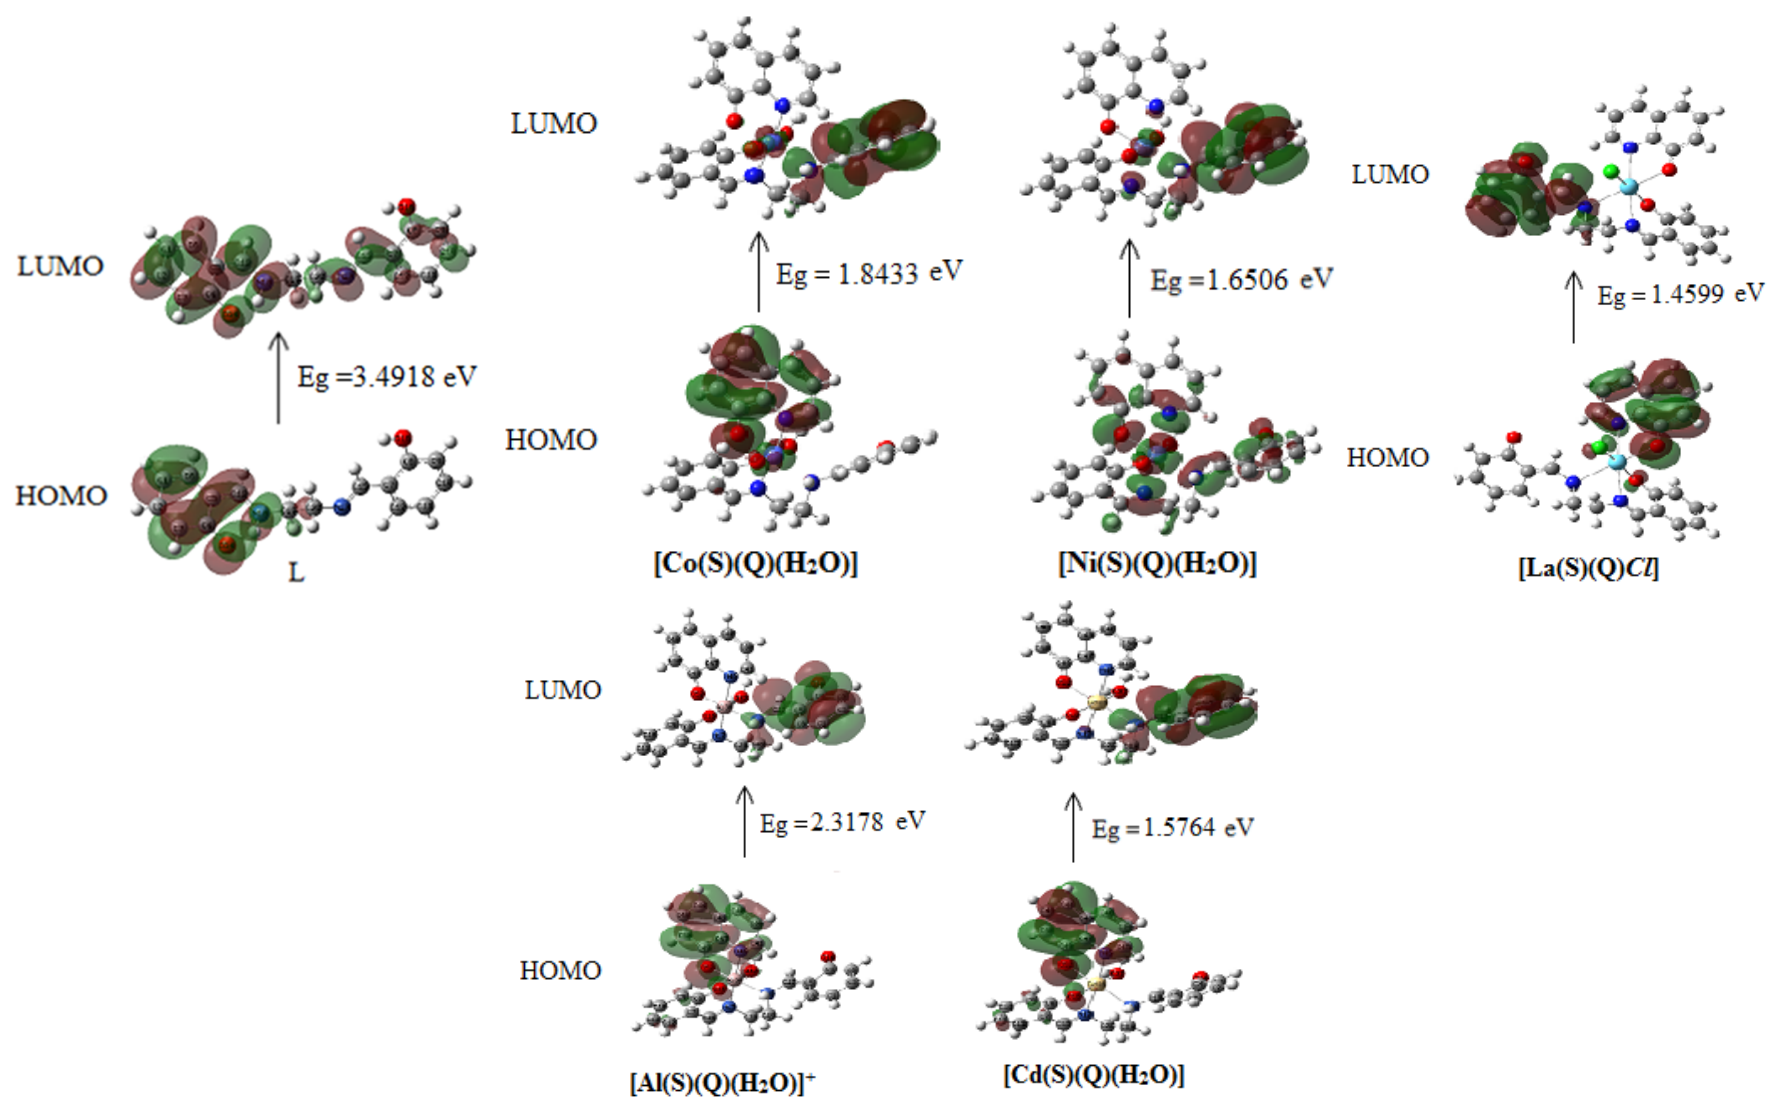

**Figure S7:** HOMO and LUMO charge density maps of ligand and complexes [Co(S)(Q)(H<sub>2</sub>O)], [Ni(S)(Q)(H<sub>2</sub>O)], [Cd(S)(Q)(H<sub>2</sub>O)], [Al(S)(Q)(H<sub>2</sub>O)]<sup>+</sup> and [La(S)(Q)(Cl)] using B3LYP/LANL2DZ

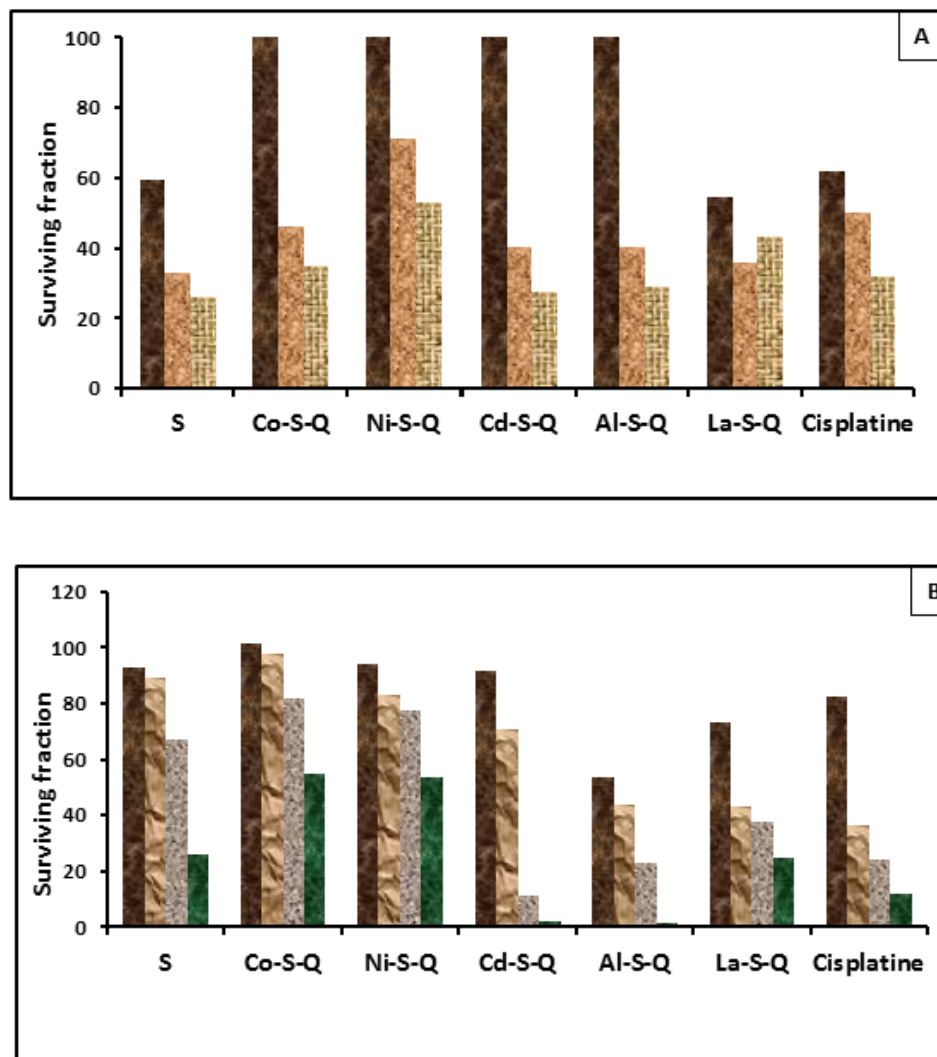

**Figure(S8): Graph showing values of % viability of (A) Hep-G2 and (B)MDA-MB231 breast cell lines in different concentration for Salen and its Co(II), Ni(II), Cd(II), Al(III), La(III) mixed 8-hydroxy quinoline -Salen Complexes**

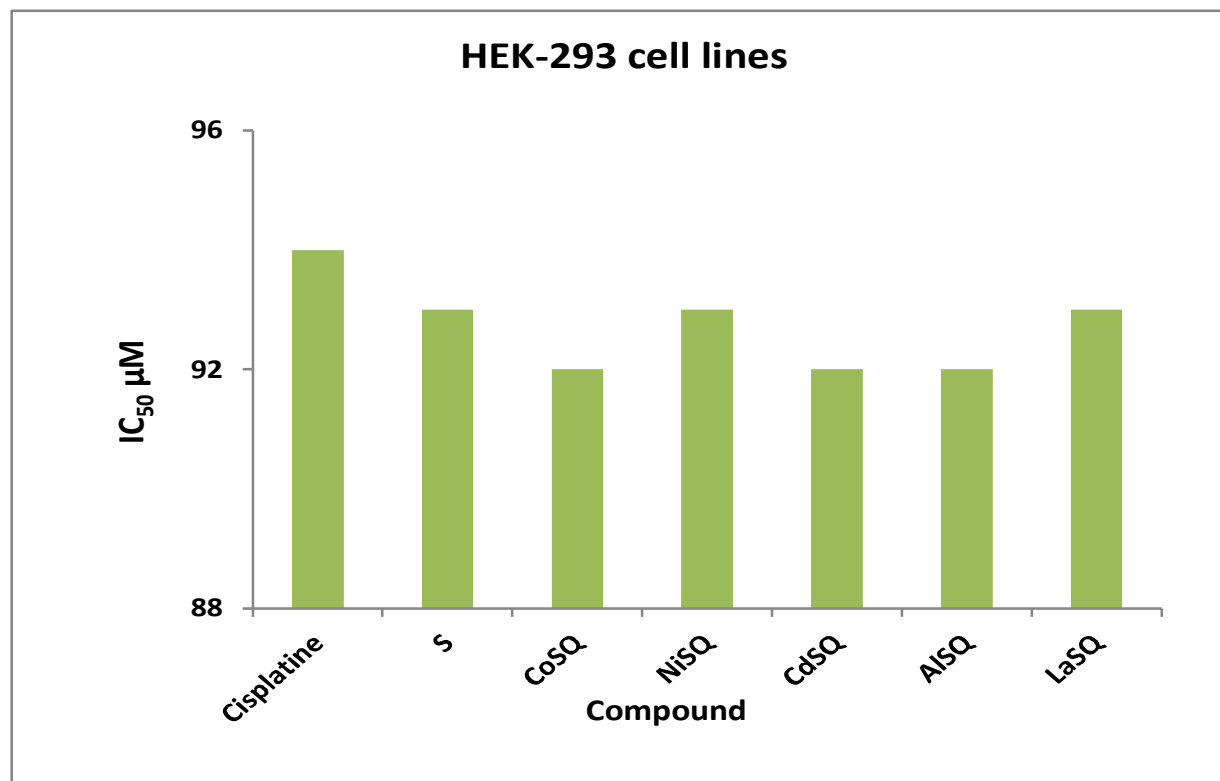

**Figure S9: IC<sub>50</sub> Values of Salen and its Cd(II), Al(III) and La(III) mixed 8-hydroxy quinoline complexes against HEK-293 cell lines compared to cisplatin.**



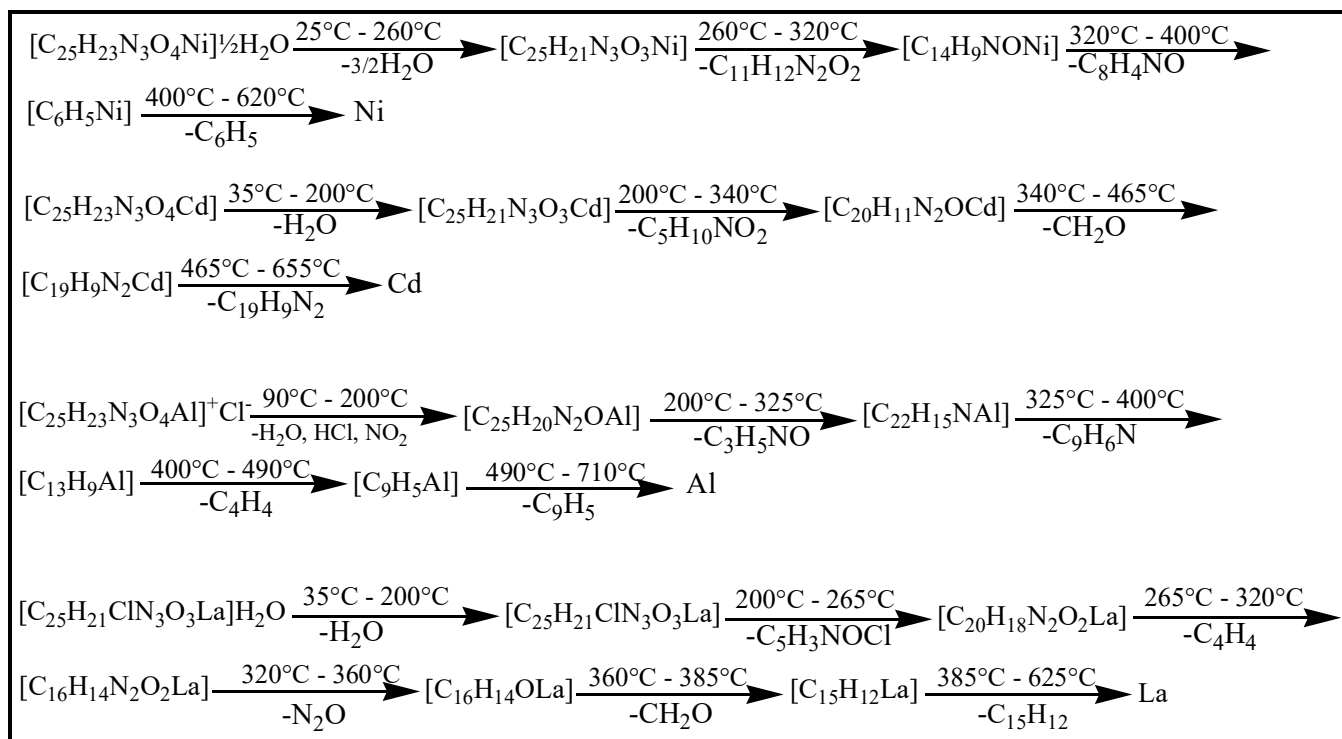

**Scheme S1:** Thermo gravimetric degradation steps for the prepared Mixed salen/8-hydroxy quinoline complexes with Ni(II), Cd(II), Al(III), La(III) from ambient temperature to 800 °C at heating rate of 10 °C / min

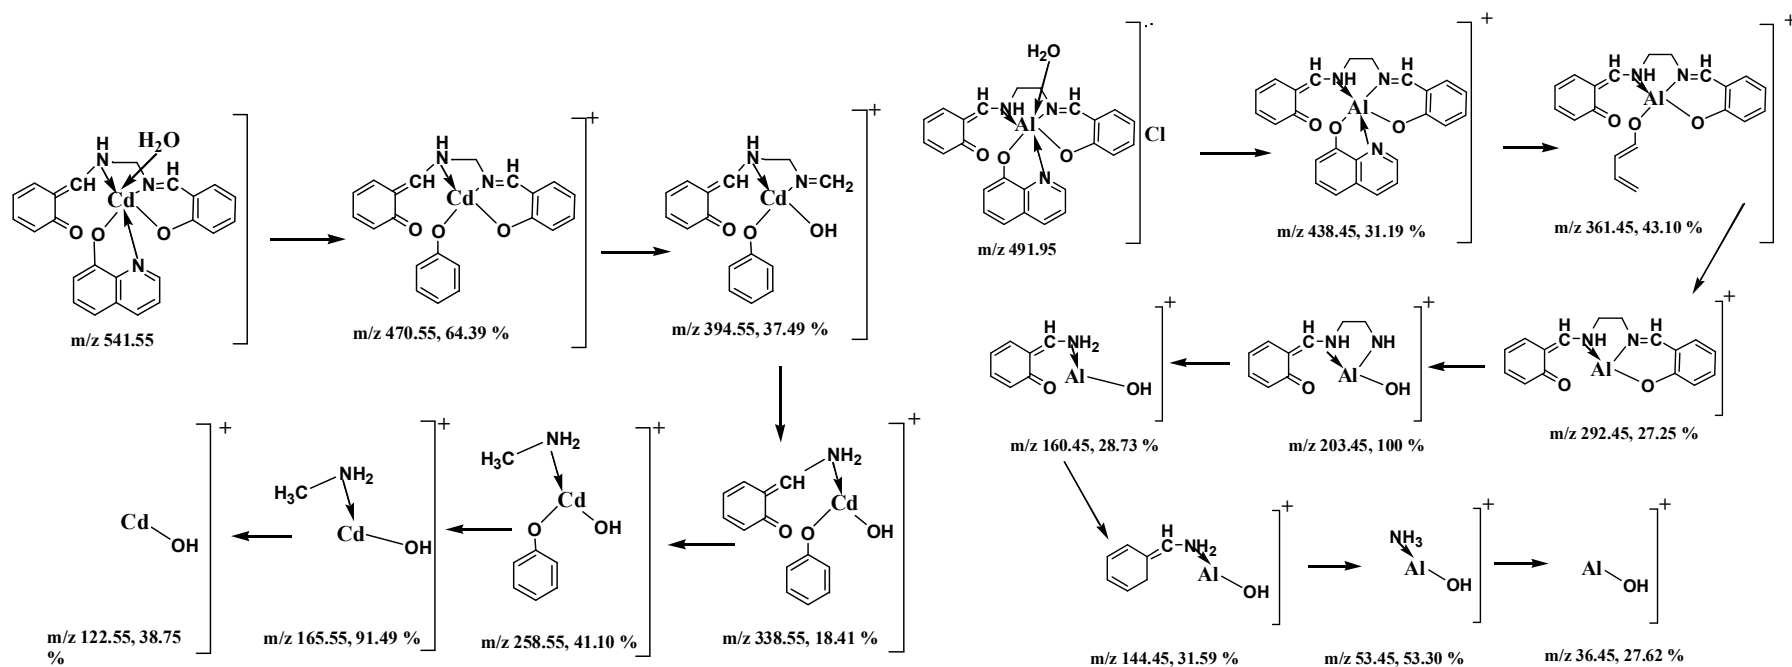

**Scheme S2:** Mass fragmentation of CdSQ and ALSQ complexes
